# Supplementary material for: Single-nucleotide polymorphisms(SNPs) in a sucrose synthase gene are associated with wood properties in Catalpa fargesii bur
Source: BMC Genet. 2018 Nov 1;19:99. doi: 10.1186/s12863-018-0686-8 (PMC6211571; doi:10.1186/s12863-018-0686-8)
Supplement: Supplementary file 1 — Table S1. Phenotype of associated population. (XLSX 19 kb) [file 12863_2018_686_MOESM1_ESM.xlsx]

## Sheet: File S1
Table S1. Phenotype of associated population
Number	Tree ID	wood basic density	pore rates	cell wall percentages	cell wall thickness	radial lumen diameter	chordwise lumen diameter	radial fiber central cavity diameter	chordwise fiber central cavity diameter	average fiber central cavity diameter
1	1	0.43327	10.8125	40.3	3.0875	14.1375	11.6	17.225	14.6875	15.9563
2	2	0.410484	8	33.685	2.5	17.2	13.825	19.7	16.325	18.0125
3	3	0.387584	10.875	37.3	3.2375	15.5375	14.575	18.775	17.8125	18.2937
4	4	0.454855	9.675	39.15	3.0525	17.55	13.8	20.6025	16.8525	18.7275
5	5	0.389501	7.85	34.075	3.175	17.125	12.55	20.3	15.725	18.0125
6	6	0.405776	8.525	30.4	2.225	17.55	12.925	19.775	15.15	17.4625
7	7	0.402182	12.225	29.95	1.9	17.65	14.45	19.55	16.35	17.95
8	8	0.440327	7.2875	38.5	3.3125	13.775	12.7625	17.0875	16.075	16.5813
9	10	0.448175	9.55	32.575	2.25	14.425	14.525	16.675	16.775	16.725
10	11	0.449894	7.15	40.725	3.2	15.375	12.9625	18.575	16.1625	17.3687
11	12	0.464548	10.3125	34.35	2.9375	13.575	12.525	16.5125	15.4625	15.9875
12	13	0.413759	8.875	32.475	2.7	17.775	14.675	20.475	17.375	18.925
13	16	0.448514	8.75	35.95	3.425	17.5	13.5	20.925	16.925	18.925
14	17	0.453524	9.2	41.25	3.575	14.8	12.625	18.375	16.2	17.2875
15	19	0.416444	11.4	37.975	3.05	14.125	12.975	17.175	16.025	16.6
16	20	0.43893	10.175	33.5	2.625	17	13.275	19.625	15.9	17.7625
17	21	0.46172	9.15	38.25	3.2	16.575	14.15	19.775	17.35	18.5625
18	22	0.417794	8.875	33.425	2.4	17.5	13.4	19.9	15.8	17.85
19	23	0.47216	13.1875	34.075	2.3125	16.45	12.875	18.7625	15.1875	16.975
20	24	0.408134	10.4	38.425	3.4	15.45	13.625	18.85	17.025	17.9375
21	25	0.450332	8	41.375	3.525	15.15	12.65	18.675	16.175	17.425
22	26	0.440004	7.3125	36.625	2.55	16.1625	12	18.7125	14.55	16.6313
23	27	0.51164	9.7625	41.075	3.25	17.4	15.3375	20.65	18.5875	19.6187
24	28	0.346561	10.7	31.675	2.7	16.6	15.2	19.3	17.9	18.6
25	30	0.454676	10.6625	38.075	3.0875	15.225	12.3625	18.3125	15.45	16.8813
26	32	0.40629	8.85	37.775	3.1	16.325	13.175	19.425	16.275	17.85
27	33	0.360445	9.175	36.575	2.7575	14.425	15.225	17.1825	17.9825	17.5825
28	34	0.440018	11.05	41	3.55	14.275	12.75	17.825	16.3	17.0625
29	35	0.428339	11.65	32.3	2.65	16.65	14.15	19.3	16.8	18.05
30	37	0.429195	10.3	40	3.825	16.45	13.6	20.275	17.425	18.85
31	38	0.449978	10.125	39.975	3.825	15.35	11.35	19.175	15.175	17.175
32	39	0.412096	10.225	36.45	2.575	20.45	15.15	23.025	17.725	20.375
33	40	0.366579	6.225	34.65	2.9	17.2	15.225	20.1	18.125	19.1125
34	41	0.360563	12.425	31.25	2.45	15.625	13.25	18.075	15.7	16.8875
35	42	0.408601	9.625	33.2	3.1	15.95	13.35	19.05	16.45	17.75
36	43	0.507419	6.5	39.075	3.4	15.475	12.3	18.875	15.7	17.2875
37	44	0.413112	10	32.7	2.525	16.375	13.8	18.9	16.325	17.6125
38	45	0.432797	8.75	41	3.45	15.225	12.975	18.675	16.425	17.55
39	46	0.454658	10.7	41.625	3.85	15.625	11.75	19.475	15.6	17.5375
40	47	0.371266	7.9125	33.475	2.6875	17.1875	14.375	19.875	17.0625	18.4688
41	48	0.426439	6.825	34.925	2.7	16.6625	14.0875	19.3625	16.7875	18.075
42	49	0.437207	8.075	37.125	2.85	13.875	12.9	16.725	15.75	16.2375
43	52	0.430061	10.975	37.8675	3.125	14.9	13.4	18.025	16.525	17.275
44	53	0.370875	6.575	32.2	2.15	16.825	14.325	18.975	16.475	17.725
45	54	0.405489	9.9625	38.9	3.2625	15.7625	13.9875	19.025	17.25	18.1375
46	55	0.436331	11.525	34.85	2.7	14.35	12.025	17.05	14.725	15.8875
47	56	0.404248	9.85	34.425	2.875	18.375	14.4	21.25	17.275	19.2625
48	57	0.407372	10.275	32.15	2.775	15.2	15.1	17.975	17.875	17.925
49	58	0.366978	10.25	36.2625	3.3125	13.825	14.45	17.1375	17.7625	17.45
50	59	0.433881	10.35	39.725	3.05	13.45	12.025	16.5	15.075	15.7875
51	60	0.41881	8.95	40.075	3.325	16.175	12.55	19.5	15.875	17.6875
52	62	0.430042	10.6	33.475	2.8	17.075	13.075	19.875	15.875	17.875
53	63	0.444593	10.85	33.485	2.875	17.05	12.525	19.925	15.4	17.6625
54	64	0.440815	10.25	32.55	2.325	16.45	13.85	18.775	16.175	17.475
55	65	0.449726	8.55	32.575	2.775	17.275	14.25	20.05	17.025	18.5375
56	66	0.398249	9.7	33.425	3	16.125	13.225	19.125	16.225	17.675
57	67	0.431682	11.8	31.125	2.475	16.5	13.875	18.975	16.35	17.6625
58	68	0.408024	11.55	32.075	2.375	17.15	14.4	19.525	16.775	18.15
59	69	0.41937	11.7	32.5	2.775	15.4	13.2	18.175	15.975	17.075
60	70	0.349385	12.225	33.8	2.725	13.425	13.15	16.15	15.875	16.0125
61	71	0.419259	10.45	39.6	3.4	15.15	12.0875	18.55	15.4875	17.0188
62	73	0.418138	8.45	35.625	2.65	17.1875	13.1	19.8375	15.75	17.7937
63	74	0.396628	10.7375	31.4	2.2375	17.075	15.875	19.3125	18.1125	18.7125
64	75	0.419688	9.9625	35.08	2.9375	14.7375	13.5	17.675	16.4375	17.0562
65	76	0.376872	12.075	33.875	2.65	16.5	13.925	19.15	16.575	17.8625
66	77	0.415038	13.65	30.1	2.225	13.975	12.225	16.2	14.45	15.325
67	78	0.462149	10.375	38.675	3.15	15.825	14.2	18.975	17.35	18.1625
68	79	0.45722	10.75	34.625	2.925	15.575	13.35	18.5	15.375	15.6875
69	81	0.4075	9.9	33.1	2.975	16.5125	14.3625	19.4875	17.3375	18.4125
70	82	0.459814	8.625	35.125	2.525	15.625	12.6375	18.15	15.1625	16.6562
71	84	0.453485	11.65	39.725	3.425	17.275	12.875	20.7	16.3	18.5
72	85	0.441602	10.625	31.725	2.975	15.1	14.125	18.075	17.1	17.5875
73	87	0.448635	9.1875	39.975	3.475	13.625	11.7375	17.1	15.2125	16.1562
74	88	0.446325	9.45	38.775	3.15	18.425	13.3	21.575	16.45	19.0125
75	89	0.468534	8.275	41.25	3.4125	15.55	11.675	18.9625	15.0875	17.025
76	90	0.394633	7.5	36.8198	2.8875	16.1	14.8	18.9875	17.6875	18.3375
77	91	0.42371	10.025	30.7	2.125	17.725	14.6	19.85	16.725	18.2875
78	92	0.430609	8.3	22.05	1.525	13.9	11.15	15.425	12.675	14.05
79	93	0.441583	9.25	30.725	2.125	17.225	13.875	19.35	16	17.675
80	94	0.427121	11.075	34.85	2.95	17.875	14.425	20.825	17.375	19.1
81	95	0.386463	10.3125	34.175	2.7875	16.7625	14.35	19.55	17.1375	18.3438
82	96	0.45008	10.025	31.25	2.6	15.125	12.95	17.725	15.55	16.6375
83	97	0.356573	11.75	37.225	2.9	16.125	14.875	19.025	17.775	18.4
84	98	0.398428	10.425	33.525	3.375	15.9	12.6	19.275	15.975	17.625
85	99	0.414253	8.35	37.325	3.075	15.975	13.475	19.05	16.55	17.8
86	101	0.408102	8.2125	31.875	2.4625	20.9875	15.6375	23.45	18.1	20.775
87	102	0.42332	10.5	33.675	2.475	16.575	12.9	19.05	15.375	17.2125
88	103	0.38627	9.125	33	2.45	15.05	13.05	17.5	15.5	16.5
89	104	0.439809	9	30.35	2.95	16.9625	13.2125	19.9125	16.1625	18.0375
90	105	0.46057	10.525	37.575	2.95	15.75	13.1	18.7	16.05	17.375
91	106	0.368954	9.4375	33.125	2.8625	15.9125	14.675	18.775	17.5375	18.1562
92	107	0.413909	8.925	35.8	3.1	13.55	12.9	16.65	16	16.325
93	108	0.424169	8.25	34.95	2.225	18.5375	14.3625	20.7625	16.5875	18.675
94	109	0.389823	11.5	30.35	2.2875	15.6875	13.25	17.975	15.5375	16.7563
95	110	0.432731	11.5625	38.325	3.1875	17.3375	12.9625	20.525	16.15	18.3375
96	111	0.414667	8.125	33.4	2.425	16.275	14.925	18.7	17.35	18.025
97	113	0.349137	8.725	35.35	3	17.275	14.075	20.275	17.075	18.675
98	114	0.403692	9.5875	31.35	2.2375	17.8125	15.275	20.05	17.5125	18.7812
99	115	0.384841	12.175	32.62	2.55	17.025	15.325	19.575	17.875	18.725
100	116	0.401406	9.4125	32.125	2.3125	15.2625	14.5625	17.575	16.875	17.225
101	118	0.438849	9.7125	31.25	2.125	18.95	13.825	21.075	15.95	18.5125
102	119	0.433445	10.025	32.875	2.925	18.825	13.95	21.75	16.875	19.3125
103	121	0.448424	11.575	34.45	2.7875	14.4	12.9125	17.1875	15.7	16.4438
104	122	0.398612	10.225	35.6	3.3	15.575	13.675	18.875	16.975	17.925
105	123	0.423044	11.325	36.95	3.425	16.325	12.675	19.75	16.1	17.925
106	124	0.402243	10.225	38.2	2.7	17.2	12.875	19.9	15.575	17.7375
107	125	0.372504	10.875	35.45	2.675	17.325	13.875	20	16.55	18.275
108	126	0.33226	10.625	34.5	2.875	15.975	14.325	18.85	17.2	18.025
109	127	0.416563	12.85	33.025	2.75	16.625	12.875	19.375	15.625	17.5
110	128	0.445149	9.45	40.075	3.325	16.025	12.275	19.35	15.6	17.475
111	129	0.381954	11.125	31.925	2.475	15.725	13.25	18.2	15.725	16.9625
112	130	0.413458	11.15	34.025	2.425	15.45	12.35	17.875	14.775	16.325
113	131	0.424197	9.275	33.7	2.75	14.05	12.525	16.45	15.45	15.975
114	133	0.348853	9.3	31.1	2.625	19.45	14.075	22.075	16.7	19.3875
115	134	0.448988	9.65	35.025	3.05	17.2	12.425	20.25	15.475	17.8625
116	135	0.491337	6.575	37.9	2.975	16.8	13.35	19.775	16.325	18.05
117	136	0.399405	9.3	37.175	2.95	17.8	14	20.75	16.95	18.85
118	137	0.463797	9.25	41.125	3.275	14.5875	12.5125	17.8625	15.7875	16.825
119	138	0.384733	10.5875	35.925	3.375	14.4125	13.4375	17.7875	16.8125	17.3
120	139	0.435716	8.225	36.4	2.7	15.625	14.075	18.325	16.775	17.55
121	140	0.345324	13.175	30.375	2.45	20.525	18.7	22.975	21.15	22.0625
122	141	0.439117	10.525	32.875	2.8	16.025	13.475	18.825	16.275	17.55
123	142	0.344442	10.15	35.675	2.975	17.1	13.45	20.075	16.425	18.25
124	143	0.422938	13.775	38.725	3.35	15.225	13.4	18.575	16.75	17.6625
125	144	0.390258	12.275	34.55	3.175	18.75	15.325	21.925	18.5	20.2125
